# Supplementary material for: Explore the Molecular Mechanism of Apoptosis Induced by Tanshinone IIA on Activated Rat Hepatic Stellate Cells
Source: Evid Based Complement Alternat Med. 2012 Dec 30;2012:734987. doi: 10.1155/2012/734987 (PMC3546466; doi:10.1155/2012/734987)

## **Materials and methods of supplemental figures**

### **S1. Image analysis for generation of intracellular ROS under Tan IIA application**

$2 \times 10^4$  HSC-T6 cells were seeded in a slide chamber, grown to 60% confluence, and cultured in serum-free Waymouth medium overnight. Cells were then incubated with  $7.5 \mu\text{M}$  Tan IIA for 6 h. Carboxy-H<sub>2</sub>DCFDA ( $4 \mu\text{M}$ , dissolved in PBS) was added to the wells and incubated for 30 min at  $37^\circ\text{C}$ . To terminate the reaction, the cells were washed with PBS twice. Next,  $500 \mu\text{L}$  culture medium was added to each well and incubated for 20 min at  $37^\circ\text{C}$ . The cells were observed and photographed using a fluorescent microscope (Olympus BX51) under DP72 PhotoImage system.

### **S2. Detection the prohibitin expression level in the presence of ROS**

$1 \times 10^6$  HSC-T6 cells were treated with  $500 \mu\text{M}$  H<sub>2</sub>O<sub>2</sub> for 1.5 h and the cells were collected for detection of prohibitin protein level by Western blotting analysis.

## **Legends of supplemental figures**

**S1.** Cells were incubated with  $7.5 \mu\text{M}$  Tanshinone IIA for 6 h and the DCF fluorescence was observed under fluorescence microscope.

**S2.** Prohibitin levels with or without H<sub>2</sub>O<sub>2</sub> were assessed by a Western blot analysis and  $\beta$ -actin was used as an internal control. Density ration of prohibitin over  $\beta$ -actin was measured by densitometer. The quantified results were indicated by the bar chart.  $*p < 0.05$ , compared to the control.

Figure 1S

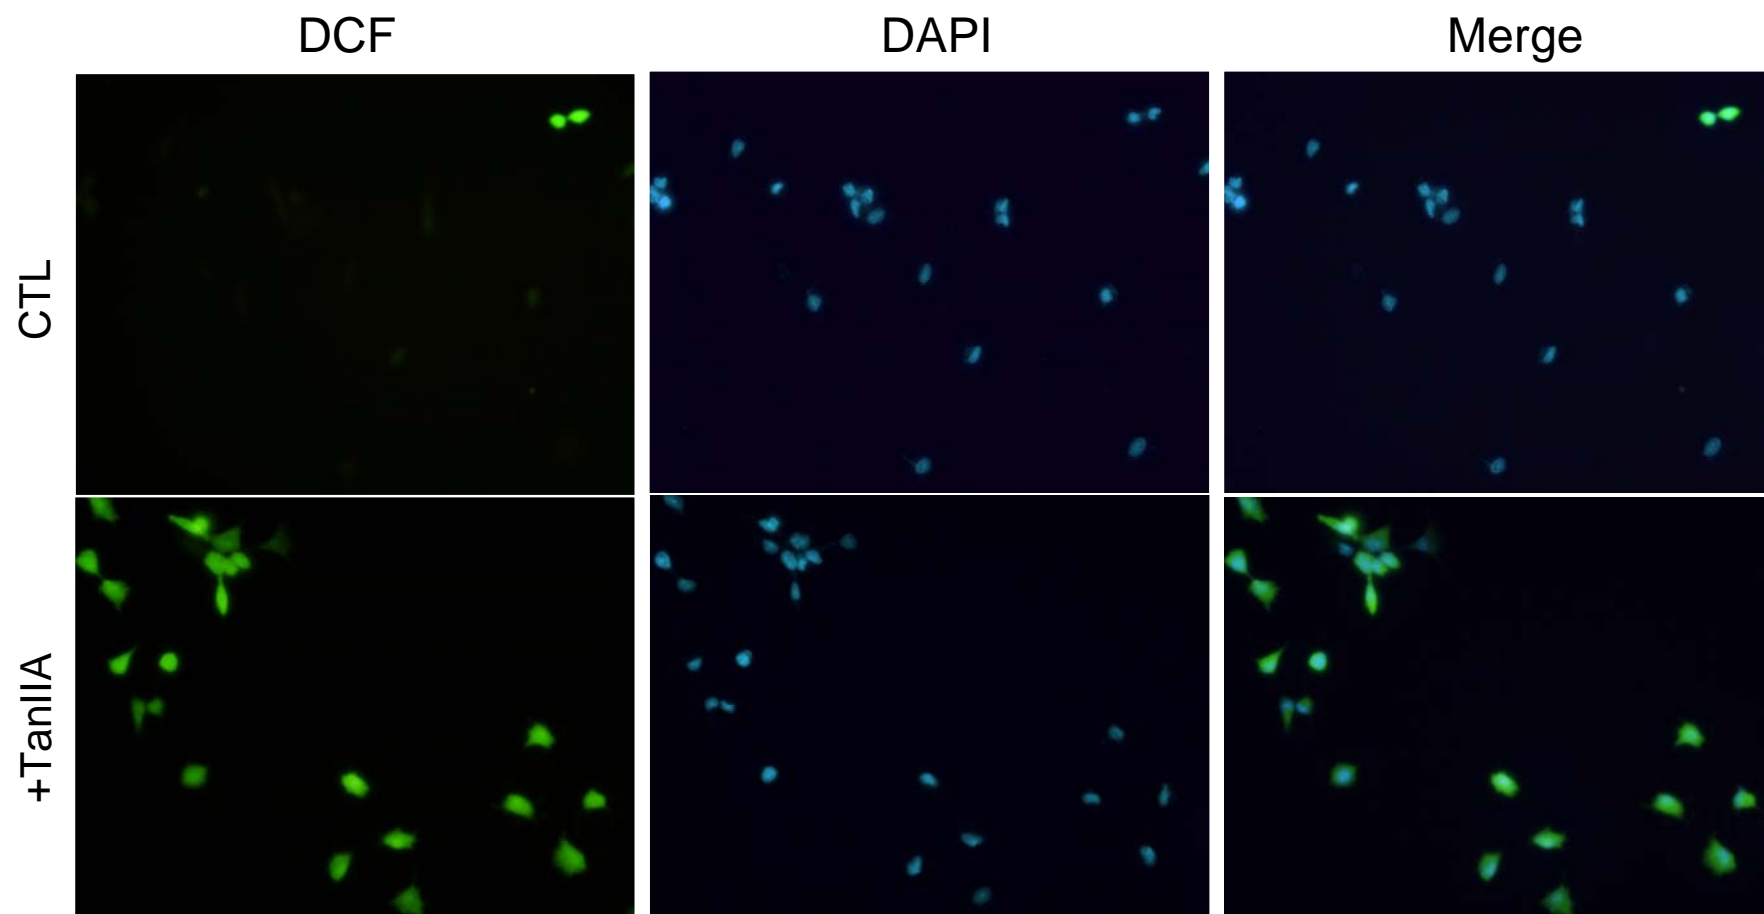

Figure 2S

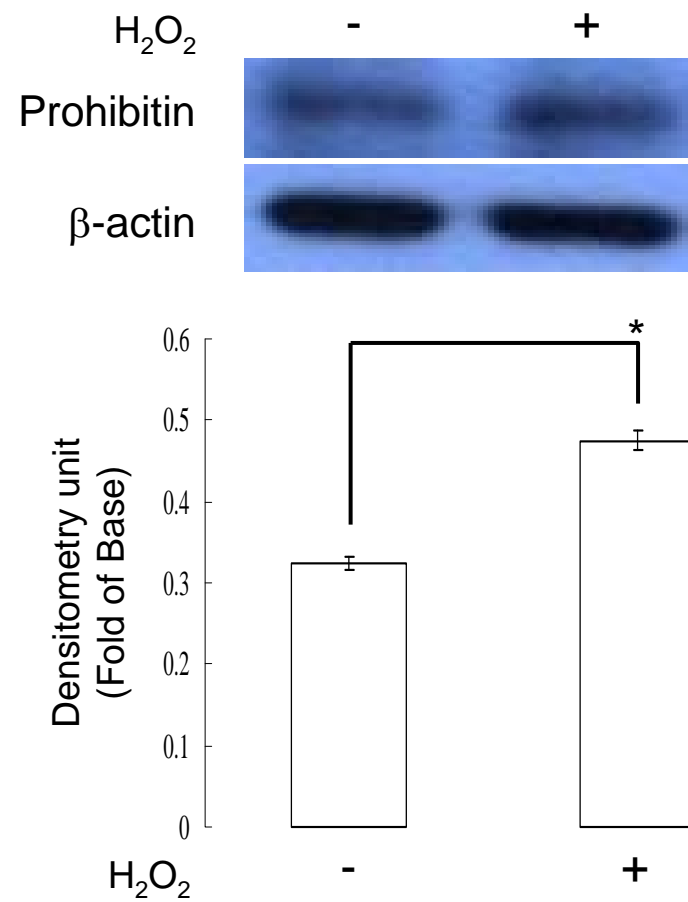

Supplement: Supplementary file 1 — Supplementary Figure 1S: Evaluation of ROS production using DCF. Supplementary Figure 2S: Prohibitin expression under H2O2 stimulation. [file 734987.f1.pdf]
